# Supplementary figures and images for: Evaluation of Osteogenic Potential of Fucoidan Containing Chitosan Hydrogel in the Treatment of Periodontal Intra-bony Defects
Source: Preprints.org preprint supplement (doi:10.20944/preprints202306.0040.v1), 2023-06-01

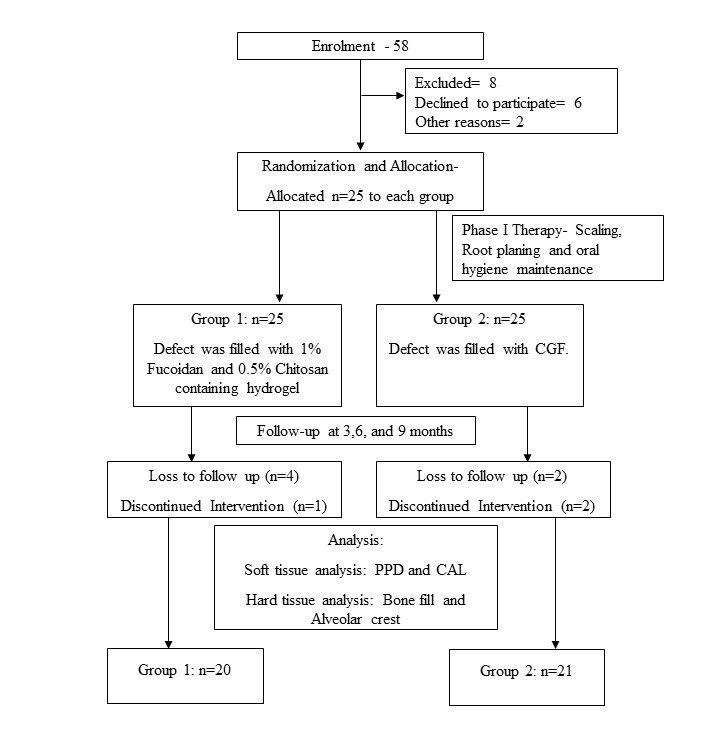


**Figure 1.** : Framework of participant flow

Supplement: Supplementary file 1 [file supplementary]
